# Supplementary material
Source: Royal Society of Chemistry journal article supplement (doi:10.1039/d6nr00604c)
Supplement: d6nr00604c1.pdf [file d6nr00604c1.pdf]

## Supporting Information

# Co/ZnO/C Heterostructured Nanowires Derived from Layered Hydroxides: Magnetically Recyclable Photocatalysts for Efficient Tetracycline Degradation

Hongyu Gong<sup>1, †</sup>, Bingcai He<sup>1, †</sup>, Yingying Song<sup>1</sup>, Zhiyang Gao<sup>1</sup>, Ruilin Gao<sup>1</sup>, Yanxin Qin<sup>1</sup>, Aijuan Han<sup>1</sup>, Lianying Wang<sup>1, \*</sup>, and Junfeng Liu<sup>1, \*</sup>

State Key Laboratory of Chemical Resource Engineering, Beijing University of Chemical Technology, Beijing 100029, PR China

<sup>‡</sup>These authors contributed equally.

Corresponding authors: Lianying Wang, wangliany@mail.buct.edu.cn, and Junfeng Liu, ljf@mail.buct.edu.cn

## Experimental

### 1.1 Materials

Tetracycline (TC),  $\text{Co}(\text{NO}_3)_2 \cdot 6\text{H}_2\text{O}$ ,  $\text{Zn}(\text{NO}_3)_2 \cdot 6\text{H}_2\text{O}$ , sodium salicylate ( $\text{C}_7\text{H}_5\text{NaO}_3$ , NaHSal), NaOH, benzoquinone (BQ), isopropyl alcohol (IPA), and triethanolamine (TEOA) were purchased from Aladdin Reagent Co., Ltd. (Shanghai, China). All chemicals were analytical grade and used as received without further purification.

### 1.2 Synthesis of $\text{ZnCo}_x\text{-Sal}$ LHRs precursor

In a typical synthesis,  $\text{Zn}(\text{NO}_3)_2 \cdot 6\text{H}_2\text{O}$  and  $\text{Co}(\text{NO}_3)_2 \cdot 6\text{H}_2\text{O}$  were dissolved in 150 mL deionized (DI) water at a molar ratio of 9:1 to prepare a  $1.0 \text{ mol L}^{-1}$  mixed solution. The above solution was then thoroughly mixed with 150 mL  $2.0 \text{ mol L}^{-1}$  NaHSal solution in a 500 mL four-necked flask. Subsequently, a  $0.5 \text{ mol L}^{-1}$  NaOH solution was added dropwise into the mixture under stirring until the pH reached approximately 6.7. The resulting reaction mixture was maintained at  $90 \text{ }^\circ\text{C}$  for 24 h under continuous stirring. After the reaction, the solid product was collected by centrifugation, washed repeatedly with DI water, and dried at  $80 \text{ }^\circ\text{C}$  for 12 h to obtain  $\text{Co}_{0.1}\text{Zn-LHRs}$ .

$\text{Zn-Sal}$  LHRs,  $\text{Co}_{0.05}\text{Zn-Sal}$  LHRs,  $\text{Co}_{0.2}\text{Zn-Sal}$  LHRs, and  $\text{Co-Sal}$  LHRs were obtained using the same synthetic method as  $\text{Co}_{0.1}\text{Zn-LHRs}$ , except for the Zn: Co molar ratio (Zn: Co = 1:0, 9.5:0.5, 8:2, and 0:1, respectively).

### 1.3 Synthesis of $\text{Co/ZnO/C}$ NWs

The as-prepared  $\text{ZnCo}_x\text{-Sal}$  LHRs powder was carefully loaded into a porcelain boat and placed in a tube furnace, where it was annealed for 1 h at  $600 \text{ }^\circ\text{C}$  with a rate of  $5 \text{ }^\circ\text{C min}^{-1}$  under a  $50 \text{ mL min}^{-1}$   $\text{N}_2$  atmosphere. The resulting samples were denoted as  $\text{ZnO/C}$  NWs,  $\text{Co}_{0.05}/\text{ZnO/C}$  NWs,  $\text{Co}_{0.1}/\text{ZnO/C}$  NWs,  $\text{Co}_{0.2}/\text{ZnO/C}$  NWs and  $\text{Co/C}$  NWs, respectively.

## 1.4 Characterization

The X-ray diffraction (XRD) patterns of the products were recorded on a Shimadzu XRD-6000 diffractometer using 40 kV, 30 mA Cu K $\alpha$  radiation ( $\lambda = 0.154$  nm). Scanning electron microscope (SEM) observations were obtained by a Hitachi S-4700 microscope. Transmission electron microscopes (TEM) images were acquired using Hitachi H-800 and JEOL JEM-2010 microscopes. X-ray photoelectron spectroscopy (XPS) was measured by a Physical Electronic PHI Quantum 2000 system equipped with a monochromatized Al K $\alpha$  X-ray source. UV-visible diffused reflectance spectra (UV-vis DRS) were determined using a UV-visible spectrophotometer (UV-2600, Shimadzu).

## 1.5 Photoelectrochemical test

Electrochemical measurements, including electrochemical impedance spectra, Mott-Schottky analysis, and photocurrent density measurements, were performed in a three-compartment electrochemical cell using a CHI 760E electrochemical workstation with 0.1 M Na<sub>2</sub>SO<sub>4</sub> as the electrolyte. Typically, 5 mg of the sample was dispersed in a mixture of 750  $\mu$ L ethanol, 200  $\mu$ L DI water, and 50  $\mu$ L 5 wt% Nafion under ultrasonic conditions for 30 min to form a homogeneous ink. The ink was then drop-cast onto cleaned fluorine-doped tin oxide (FTO) glass plates with dimensions of 1.0 $\times$ 2.0 cm<sup>2</sup> and an effective working area of 1.0 $\times$ 1.0 cm<sup>2</sup>, which was used as the working electrode. An Ag/AgCl electrode and a Pt plate (1.0 $\times$ 1.0 cm<sup>2</sup>) were used as the reference and counter electrodes, respectively. The light source was a 300 W xenon lamp (PLS-SXE300/300UV, 320~780 nm). The distance between the xenon lamp and the catalyst was 15 cm to ensure that the light intensity remains consistent (400 mW cm<sup>-2</sup>) during the test. And the voltage applied in the transient photocurrent test was the 0.5 V vs. Ag/AgCl. Besides, the transient absorption spectroscopy were tested in FLS980 (Edinburgh Instrument).

## 1.6 Photocatalytic performance evaluation

5 mg of as-prepared photocatalyst was dispersed in 30 mL of 50 mg L<sup>-1</sup> TC solution and stirred under dark conditions for 20 min to achieve adsorption-desorption equilibrium. Subsequently, under irradiation using a Xenon lamp as a simulated visible light source, 2.0 mL aliquots of the reaction mixture were collected at 10-minute intervals and analyzed for TC concentration using a UV-2600 spectrophotometer.

The photocatalytic degradation efficiency ( $\eta$ , %) of TC was calculated according to the following equation:  $\eta = (1 - C_t/C_0) \times 100\%$ , where  $C_0$  denotes the initial TC concentration and  $C_t$  represents the TC concentration after degradation. The apparent photocatalytic rate constant ( $k$ ) was calculated using the following equation:  $k = \ln(C_0/C_t)/t$ .

The band gap energy ( $E_g$ ) of the sample was determined from the Kubelka-Munk equation:  $(\alpha h\nu)^{1/n} = A(h\nu - E_g)$ .

## 1.7 The determination of reactive species

To identify the primary reactive species involved in the photocatalytic process, different radical scavengers were introduced into the photocatalytic system. Benzoquinone (BQ, 0.2 mmol L<sup>-1</sup>), isopropanol (IPA, 0.2 mmol L<sup>-1</sup>), and triethanolamine (TEOA, 0.2 mmol L<sup>-1</sup>) were used as scavengers for superoxide radicals ( $\cdot O_2^-$ ), hydroxyl radicals ( $\cdot OH$ ), and photogenerated holes ( $h^+$ ), respectively, in the quenching experiments.

## Supporting Figures

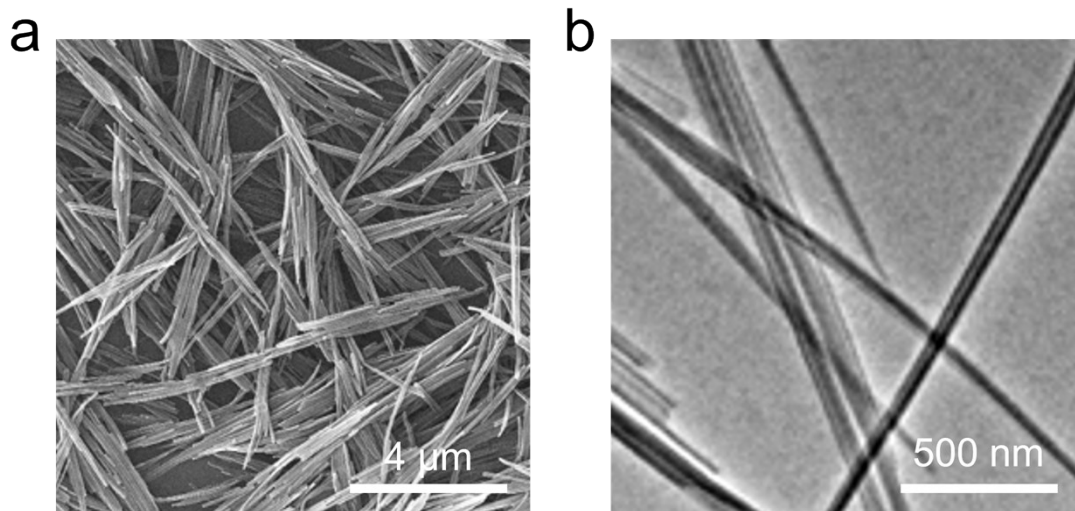

**Fig. S1** (a) SEM and (b) TEM images of  $\text{Co}_{0.1}/\text{ZnO}/\text{C}$  NWs.

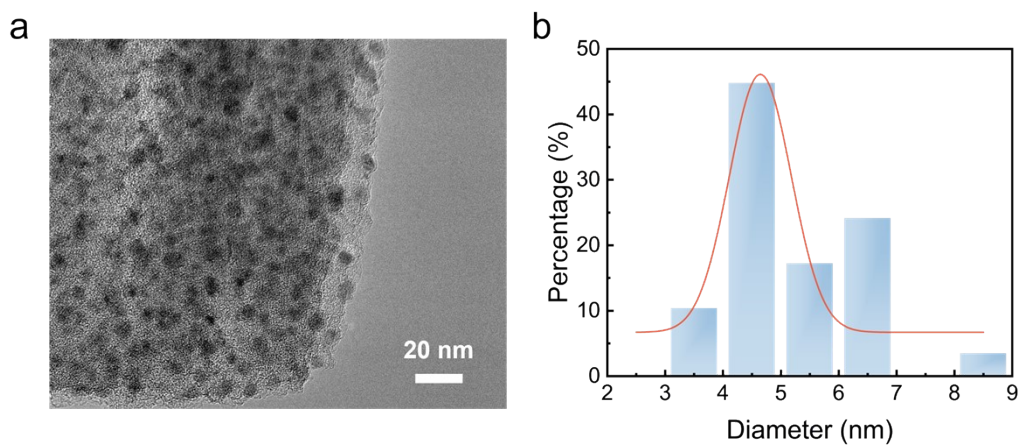

**Fig. S2** (a) HRTEM image and (b) particle size statistic result of  $\text{Co}_{0.1}/\text{ZnO}/\text{C}$  NWs.

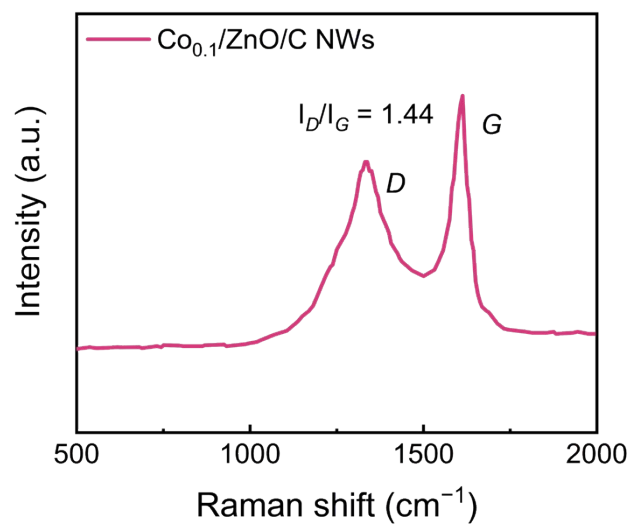

**Fig. S3** Raman spectrum of Co<sub>0.1</sub>/ZnO/C NWs.

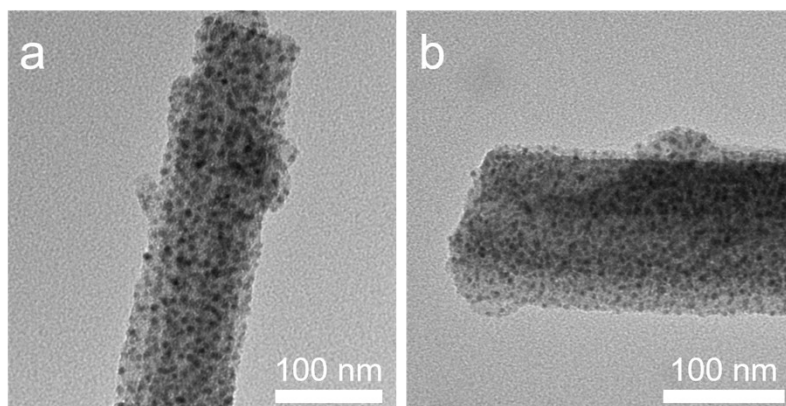

**Fig. S4** TEM images of (a) Co<sub>0.05</sub>/ZnO/C NWs and (b) Co<sub>0.2</sub>/ZnO/C NWs.

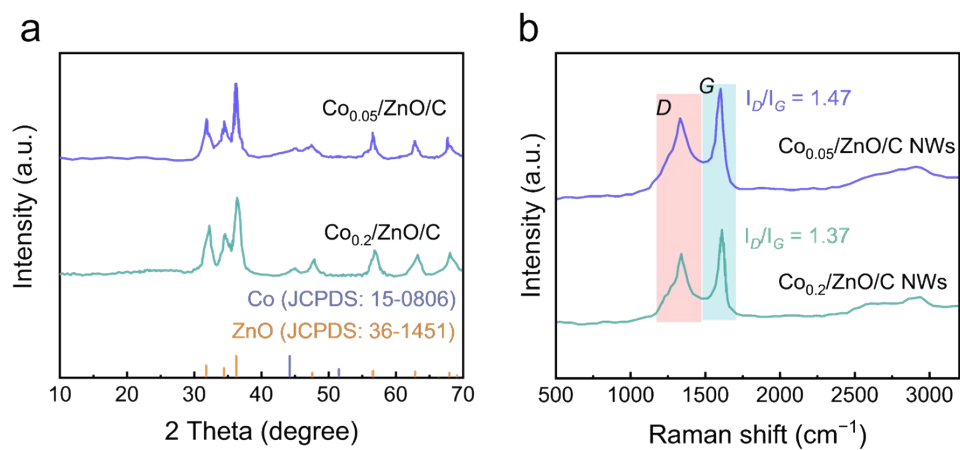

**Fig. S5** XRD patterns (a) and Raman spectra (b) of  $\text{Co}_{0.05}/\text{ZnO}/\text{C}$  NWs and  $\text{Co}_{0.2}/\text{ZnO}/\text{C}$  NWs.

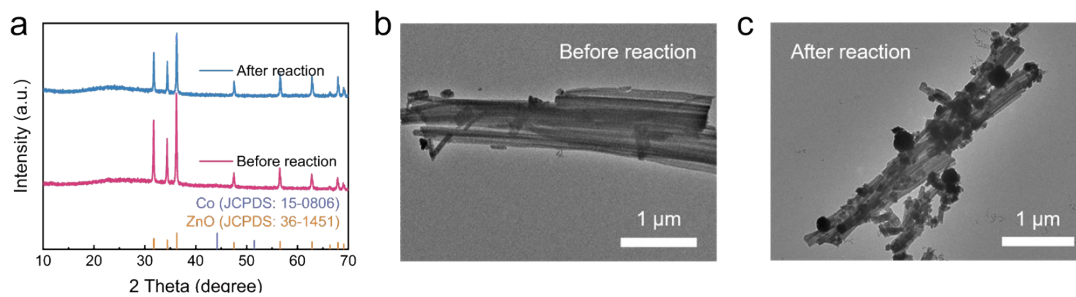

**Fig. S6** (a) XRD pattern of  $\text{Co}_{0.1}/\text{ZnO}/\text{C}$  NWs before and after reaction. (b, c) TEM images of  $\text{Co}_{0.1}/\text{ZnO}/\text{C}$  NWs before (b) and after (c) reaction.

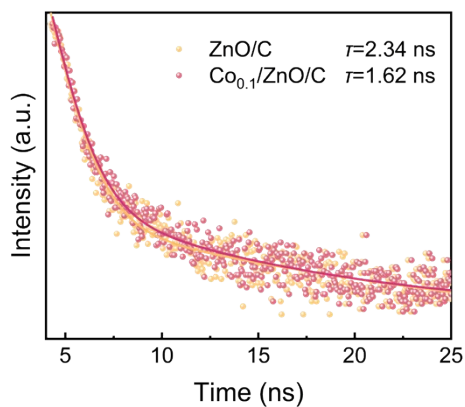

**Fig. S7** The transient absorption spectroscopy results of ZnO/C NWs and Co<sub>0.1</sub>/ZnO/C NWs.

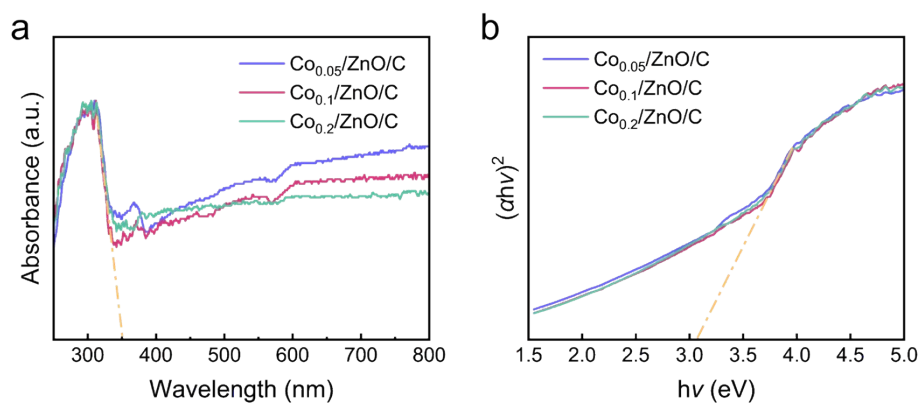

**Fig. S8** (a) UV-vis DRS plots, (b) transformed Kubelka-Munk function versus photon energy of Co/ZnO/C NWs with different Co amount.

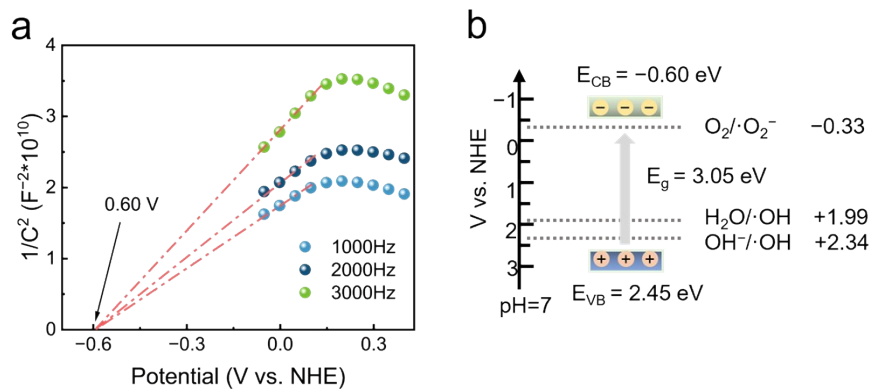

**Fig. S9** (a) Mott-Schottky plot of  $Co_{0.1}/ZnO/C$  NWs in 0.1 M  $Na_2SO_4$  (pH = 7) and (b) the band structure diagram of  $Co_{0.1}/ZnO/C$  NWs.

**Table S1.** Zn/Co ratios of the Co<sub>0.1</sub>/ZnO/C NWs and corresponding precursor by inductively coupled plasma emission spectroscopy (ICP-ES).

| Sample         | ZnCo <sub>0.1</sub> -LHRs | Co <sub>0.1</sub> /ZnO/C NWs |
|----------------|---------------------------|------------------------------|
| Ratio of Zn/Co | 8.97:1.03                 | 8.85:1.15                    |

**Table S2.** The binding energies of Zn 2*p* and Co 2*p*.

| Sample                     | Zn 2 <i>p</i> Binding energy (eV) |                           | Co 2 <i>p</i> Binding energy (eV) |                           |
|----------------------------|-----------------------------------|---------------------------|-----------------------------------|---------------------------|
|                            | 2 <i>p</i> <sub>1/2</sub>         | 2 <i>p</i> <sub>3/2</sub> | 2 <i>p</i> <sub>1/2</sub>         | 2 <i>p</i> <sub>3/2</sub> |
| ZnO NWs                    | 1044.9                            | 1021.8                    | —                                 | —                         |
| Co <sub>0.1</sub> /ZnO NWs | 1045.2                            | 1022.1                    | 797.1                             | 781.7                     |
| Co NWs                     | —                                 | —                         | 795.5                             | 780.2                     |

**Table S3.** Summary of the photocatalytic degradation of TC by different photocatalysts.

| Photocatalyst                                                                    | Light                       | Dosage | TC                            | Degradation rate (mg g <sub>cat</sub> <sup>-1</sup> h <sup>-1</sup> ) | Ref       |
|----------------------------------------------------------------------------------|-----------------------------|--------|-------------------------------|-----------------------------------------------------------------------|-----------|
| Ag/Bi <sub>2</sub> Sn <sub>2</sub> O <sub>7</sub> -C <sub>3</sub> N <sub>4</sub> | 400 W Tungsten Halogen lamp | 200 mg | 200 mL, 20 mg L <sup>-1</sup> | 1.49                                                                  | 1         |
| BIM-34                                                                           | 300 W-Xe lamp               | 20 mg  | 100 mL, 10 mg L <sup>-1</sup> | 45.80                                                                 | 2         |
| CWB-2                                                                            | 300 W-Xe lamp               | 20 mg  | 50 mL, 20 mg L <sup>-1</sup>  | 48.65                                                                 | 3         |
| MIL-101(Fe)/CN/FOC-0.5                                                           | 300 W-Xe lamp               | 20 mg  | 100 mL, 20 mg L <sup>-1</sup> | 97.40                                                                 | 4         |
| BiOI/BiOIO <sub>3</sub>                                                          | 500 W-Xe lamp               | 50 mg  | 50 mL, 20 mg L <sup>-1</sup>  | 3.37                                                                  | 5         |
| Co <sub>0.1</sub> /ZnO/C NWs                                                     | 300 W-Xe lamp               | 10 mg  | 30 mL, 50 mg L <sup>-1</sup>  | 147.96                                                                | This work |

**Table S4** Catalyst mass recovered via magnetic separation after five consecutive cycles.

| Cycle     | 0     | 1    | 2    | 3    | 4    | 5    |
|-----------|-------|------|------|------|------|------|
| Mass (mg) | 10.00 | 9.92 | 9.71 | 9.63 | 9.61 | 9.54 |

**Table S5** The kinetic analysis of emission decay for Co/ZnO/C NWs.

| Sample                   | $\tau_1$ | $\tau_2$ | $\tau_{\text{average}}$ |
|--------------------------|----------|----------|-------------------------|
| ZnO/C                    | 1.22     | 17.18    | 2.34                    |
| Co <sub>0.1</sub> /ZnO/C | 1.18     | 10.02    | 1.62                    |

## References

1. S. Heidari, M. Haghghi and M. Shabani, *Chem. Eng. J.*, 2020, 389, 123418.
2. J. Liu, S. Gong, Z. Wu, J. Shi and H. Deng, *Chem. Eng. J.*, 2024, 483, 149156.
3. W. Tie, S. S. Bhattacharyya, T. Ma, S. Yuan, M. Chen, W. He and S. H. Lee, *Carbon*, 2025, 231, 119707.
4. Q. Yu, Z. Zhao, Z. Wei, M. Ding, Z. Li, J. Jia, M. Zhou, L. Yuan, J. Bai and H. Zhang, *Appl. Surf. Sci.*, 2025, 688, 162386.
5. W. Mu, L. Wang and C. Chang, *J. Environ. Manage.*, 2024, 356, 120630.
